# Supplementary material
Source: publisher figshare collection journal article supplement (https://acs.figshare.com/ndownloader/files/4669075)
Supplement: Supplementary file 1 [file 4669075]

**Supporting Information**

Theoretical Study of Metal - Ligand Interaction in Sm(III), Eu(III) and Tb(III) Complexes of Coumarin-3-Carboxylic Acid in Gas Phase and Solution

Ivelina Georgievaa, Natasha Trendafilovaa*, Adélia J. A. Aquinob and Hans Lischkab*

*aInstitute of General and Inorganic Chemistry, Bulgarian Academy of Sciences, Sofia, Bulgaria*

*bInstitute for Theoretical Chemistry, Währingerstrasse 17, University of Vienna, A-1090 Vienna, Austria*

Optimized geometries in Cartesian coordinates at B3LYP/B1 level

**cca-**

c -0.92502522 1.04701483 0.00411563

c 0.39052361 0.45716608 -0.00209646

c 0.47144717 -0.95226955 -0.00267924

o -0.65711766 -1.70531118 -0.00201361

c -1.96010792 -1.17089474 0.00091964

c -2.06295943 0.29718000 0.00453550

c 1.59796619 1.18801033 -0.00338186

c 2.83093023 0.54002887 -0.00413730

c 2.88466239 -0.86386991 -0.00356496

c 1.70586395 -1.61212337 -0.00380717

o -2.85951805 -1.97144771 0.00393723

c -3.46262336 0.94885534 0.01186992

o -3.94789386 1.14178479 -1.12188828

o -3.89783764 1.22652197 1.14790547

h 1.54722607 2.28181934 -0.00331225

h 3.75648069 1.12546718 -0.00436612

h 1.71648097 -2.70585370 -0.00425305

h 3.85252261 -1.37661910 -0.00351218

h -1.00702703 2.13997626 0.01144493

**Sm(cca)2+**

c 1.09807706 3.00814700 0.00000000

c 2.25045609 2.18512368 0.00000000

c -0.19039300 2.46757889 0.00000000

c 2.12625384 0.80696768 0.00000000

c 0.83107573 0.21769828 0.00000000

c -0.30363160 1.08273149 0.00000000

c 0.59422481 -1.16958559 0.00000000

o -1.55839348 0.52840459 0.00000000

c -0.70566124 -1.68996584 0.00000000

c -1.77897429 -0.76657629 0.00000000

o -3.04386830 -1.08569753 0.00000000

c -0.86940026 -3.18605709 0.00000000

o 0.04263093 -3.94992423 0.00000000

o -2.18256426 -3.61290789 0.00000000

sm -4.11343288 -2.95052171 0.00000000

h 1.21847534 4.09621525 0.00000000

h 3.24205756 2.64634204 0.00000000

h -1.08115637 3.09972405 0.00000000

h 3.00802660 0.15976550 0.00000000

h 1.43171597 -1.87592804 0.00000000

**Eu(cca)2+**

c 1.93038213 -1.52661669 0.00000000

c 0.72113347 -0.84298837 0.00000000

c 0.63955677 0.58160275 0.00000000

c 1.85514474 1.32262313 0.00000000

c 3.06542683 0.65130889 0.00000000

c 3.10063028 -0.76427859 0.00000000

o -0.43865860 -1.57502806 0.00000000

c -1.63561273 -1.03582942 0.00000000

c -1.80200696 0.36982778 0.00000000

c -0.64447308 1.15928245 0.00000000

o -2.60624766 -1.90822279 0.00000000

c -3.13684154 1.06453621 0.00000000

o -3.26867080 2.24646878 0.00000000

o -4.22160435 0.20695044 0.00000000

h 1.81597185 2.41564512 0.00000000

h 4.00427294 1.21235347 0.00000000

h 1.95170164 -2.61892939 0.00000000

h 4.06771135 -1.27696466 0.00000000

h -0.76474094 2.24836683 0.00000000

eu -4.73402500 -1.75420547 0.00000000

**Tb(cca)2+**

c 1.92697728 -1.52436721 0.00000000

c 0.71748090 -0.84151423 0.00000000

c 0.63517511 0.58354473 0.00000000

c 1.85016489 1.32573318 0.00000000

c 3.06066585 0.65524763 0.00000000

c 3.09643602 -0.76041311 0.00000000

o -0.44270885 -1.57364786 0.00000000

c -1.63845646 -1.03359652 0.00000000

c -1.80581439 0.37110713 0.00000000

c -0.64836079 1.16110158 0.00000000

o -2.61112857 -1.90623426 0.00000000

c -3.14156175 1.06356680 0.00000000

o -3.27708340 2.24446058 0.00000000

o -4.22460079 0.20220228 0.00000000

h 1.81041002 2.41886520 0.00000000

h 3.99883294 1.21689427 0.00000000

h 1.94954383 -2.61677623 0.00000000

h 4.06367207 -1.27266264 0.00000000

h -0.76799423 2.25033569 0.00000000

tb -4.70818853 -1.73952174 0.00000000

**Sm(cca)2+**

c 4.98100805 -4.65766716 -1.24623632

c 4.52854729 -3.46895790 -0.67325336

c 5.30698967 -2.72827792 0.24446964

c 6.59101486 -3.22004414 0.58682597

c 7.05267668 -4.40004301 0.02411248

c 6.24784374 -5.11521339 -0.88881981

o 3.28684545 -3.01814890 -1.02215791

c 2.73093343 -1.89826822 -0.54113966

c 3.47882175 -1.09748268 0.39887396

c 4.73701143 -1.52997744 0.76172733

o 1.57865059 -1.65890753 -0.98285919

sm -0.00850495 -0.01226692 -0.46241862

o 1.73821640 0.55307549 0.68721068

c 2.97110248 0.21036048 1.00741327

o 3.69935393 0.85220599 1.72636878

o -1.60888922 1.61516833 -0.99932152

c -2.74662542 1.87520647 -0.53217703

o -3.31562018 2.97624922 -1.03968418

c -4.54595137 3.44317675 -0.67212796

c -5.29745913 2.74041891 0.29631028

c -4.71431255 1.56131816 0.84209716

c -3.46715474 1.11289084 0.46028534

c -2.94262385 -0.17076451 1.10476232

o -3.65226793 -0.78547686 1.86486924

o -1.71715355 -0.52400142 0.76799810

h 4.34582090 -5.19943237 -1.95093405

h 6.62246323 -6.04572010 -1.32495546

h 8.04340649 -4.78097916 0.28650719

h 7.20471621 -2.65784883 1.29619801

h 5.29694796 -0.91340077 1.47206354

h -5.25491619 0.97348446 1.59098470

c -5.01409483 4.60969639 -1.27742636

c -6.26888657 5.08400345 -0.89956009

c -7.04699469 4.40669632 0.06390750

c -6.57053089 3.24766207 0.65716445

h -4.40052795 5.12213278 -2.02162576

h -6.65534925 5.99824047 -1.35982025

h -8.02855968 4.80029774 0.34095576

h -7.16383600 2.71379709 1.40496588

**Eu(cca)2+**

c 4.95676613 -4.64934921 -1.24974644

c 4.50531673 -3.45998502 -0.67691153

c 5.28497362 -2.72078419 0.24087864

c 6.56861877 -3.21375823 0.58320016

c 7.02887201 -4.39457703 0.02135345

c 6.22315598 -5.10828638 -0.89163983

o 3.26442075 -3.00544763 -1.02533627

c 2.71211791 -1.88526475 -0.54225749

c 3.46093941 -1.08641315 0.39823556

c 4.71919918 -1.52112508 0.75849795

o 1.55978131 -1.64106083 -0.98307860

eu -0.00785811 -0.01035720 -0.44280848

o 1.72016799 0.56183547 0.70490944

c 2.95544839 0.21904312 1.01489007

o 3.68789387 0.85812837 1.73174322

o -1.58990622 1.60093105 -0.99748659

c -2.72878385 1.86345780 -0.53289974

o -3.29444814 2.96534967 -1.04216194

c -4.52448654 3.43471646 -0.67533821

c -5.27738667 2.73194861 0.29214039

c -4.69739199 1.55204260 0.83850795

c -3.45029426 1.10210717 0.45871228

c -2.92731571 -0.17964767 1.10932469

o -3.63897467 -0.79057372 1.87037611

o -1.70143712 -0.53509414 0.77718312

h 4.32225561 -5.19121742 -1.95465660

h 6.59701920 -6.03928232 -1.32778645

h 8.01870823 -4.77697706 0.28445455

h 7.18296623 -2.65127277 1.29194117

h 5.28236723 -0.90582043 1.46744549

h -5.24014091 0.96515965 1.58630967

c -4.99222660 4.60217857 -1.27936971

c -6.24753857 5.07599211 -0.90197647

c -7.02633762 4.39859200 0.06072770

c -6.55014038 3.23931766 0.65326208

h -4.37858629 5.11608028 -2.02265406

h -6.63392067 5.99022627 -1.36202431

h -8.00798607 4.79198456 0.33792728

h -7.14322138 2.70488739 1.40076578

**Tb(cca)2+**

c 4.91916132 -4.62999439 -1.25221372

c 4.47550821 -3.43805909 -0.67935008

c 5.26038361 -2.70208549 0.23695250

c 6.54144573 -3.20266414 0.57859677

c 6.99346876 -4.38666964 0.01692328

c 6.18318319 -5.09589720 -0.89552778

o 3.23541999 -2.97965479 -1.02641165

c 2.68540597 -1.86148596 -0.53907412

c 3.43851185 -1.06579542 0.40011284

c 4.69816303 -1.50147593 0.75605589

o 1.53062236 -1.61552548 -0.97554427

tb -0.00804352 -0.00672191 -0.41763496

o 1.69756138 0.57925469 0.70871288

c 2.93239093 0.23613063 1.02184415

o 3.66176677 0.87184632 1.74438560

o -1.56410837 1.57952452 -0.99135429

c -2.70516419 1.84303308 -0.52988887

o -3.26957536 2.94278216 -1.04239655

c -4.49928093 3.41453505 -0.67718875

c -5.25619030 2.71445489 0.28942233

c -4.67804050 1.53468215 0.83762991

c -3.42947316 1.08485079 0.46131575

c -2.90447760 -0.19232130 1.11724758

o -3.61316156 -0.80135119 1.88220906

o -1.67765450 -0.54541421 0.78455156

h 4.27945948 -5.16800165 -1.95523942

h 6.55133200 -6.02935219 -1.33157647

h 7.98092127 -4.77547789 0.27960283

h 7.15976667 -2.64514899 1.28791714

h 5.26349592 -0.88700628 1.46397328

h -5.22145891 0.94818121 1.58542979

c -4.96065950 4.58339977 -1.28293407

c -6.21393156 5.06327295 -0.90734571

c -6.99626780 4.39039707 0.05603676

c -6.52660084 3.22907233 0.64990908

h -4.34236431 5.09395742 -2.02448797

h -6.59564495 5.97909975 -1.36805832

h -7.97510338 4.78989172 0.33398306

h -7.12304640 2.70055461 1.39878881

**Eu(cca)3**

c -3.43864489 -0.31064847 4.76257944

c -2.33387280 -0.77425998 4.04292488

c -1.58974862 -1.89549577 4.46213293

c -1.98234212 -2.55742860 5.64760971

c -3.07926035 -2.10763812 6.37009764

c -3.80504179 -0.98525661 5.92495537

o -1.98708081 -0.11104409 2.90518403

c -0.95113963 -0.47300485 2.09759164

c -0.16100658 -1.63241661 2.48621869

c -0.48656005 -2.29273820 3.63922453

c 1.01764584 -2.14903855 1.64962232

o 1.68974805 -3.05690479 2.11339974

o -0.79069823 0.23901857 1.10537267

eu 0.57392305 0.03540661 -0.94815171

o 2.42721224 1.32420325 -1.04526007

c 3.65382338 1.38819218 -1.44251430

o 4.42332935 2.32203770 -1.27958095

o -0.77478260 2.05420923 -1.26826298

c -1.98835707 2.18777680 -1.41821694

c -2.92312932 1.20418239 -1.95135796

c -4.24928761 1.53139806 -2.02252555

c -4.75062847 2.79806018 -1.57499754

c -3.80726266 3.72646427 -1.08911347

o -2.48697639 3.40072417 -1.04905915

c -4.18519497 4.99249744 -0.63163280

c -5.53680134 5.32919407 -0.64933378

c -6.50348091 4.41961288 -1.12230444

c -6.11469126 3.16901779 -1.58443606

c -2.48428702 -0.19202460 -2.42417812

o -3.30597854 -0.87023574 -3.02123666

o -1.27838874 -0.53612375 -2.12008238

o 2.08633089 -0.97524107 -2.54989719

c 3.31554341 -0.92507070 -2.64087677

o 3.89032292 -1.98125756 -3.27230787

c 5.23268700 -2.12925696 -3.44144678

c 6.11635303 -1.12780058 -2.99007416

c 5.53525066 0.02002439 -2.35879827

c 4.18600273 0.14087725 -2.16453385

c 7.50379753 -1.32215679 -3.17910457

c 7.97140265 -2.47689629 -3.79233623

c 7.06310320 -3.45972013 -4.23383617

c 5.69050407 -3.29375625 -4.06475353

h 4.96956348 -4.04422903 -4.39677715

h 7.43772125 -4.36876488 -4.71408129

h 9.04573250 -2.62632847 -3.93229580

h 8.19824886 -0.55185258 -2.83089352

h 6.17132378 0.83746219 -2.00449848

h -4.93108368 0.78015476 -2.43357515

h -3.41966414 5.68216991 -0.26865503

h -5.84949350 6.31393909 -0.28902835

h -7.55994034 4.70237017 -1.12600827

h -6.85451841 2.45493245 -1.95848131

h 0.12872672 -3.15545869 3.91480255

h -1.41036618 -3.42868400 5.98088026

h -3.38346720 -2.62469268 7.28448534

h -4.67048740 -0.63680327 6.49689388

h -3.98852348 0.56114042 4.40047359

o 1.18694472 -1.57423949 0.50805020

**Sm(cca)(H2O)2Cl2**

c -0.33821049 -0.18540558 0.11041787

o -0.31661978 -0.72364199 1.35490429

c 0.71309483 -0.57117367 2.23465610

c 1.84871054 0.18059684 1.86856198

c 1.85593724 0.75361550 0.55735338

c 0.81186664 0.59435093 -0.31571257

c 0.59941769 -1.17623222 3.48942828

c 1.64672351 -1.02297711 4.39540672

c 2.79468584 -0.27742374 4.05867577

c 2.89607549 0.31807873 2.80891633

c 0.91233450 1.24232447 -1.70019281

o -0.10798393 1.08676779 -2.47845721

sm -2.21563745 0.18031615 -2.71465969

o -1.36055744 -0.42537415 -0.54233342

o 1.93498337 1.84855044 -1.97698677

h 1.57356608 -1.48939037 5.38222742

h 3.60560846 -0.16896445 4.78412867

h -0.29748875 -1.75047982 3.73220658

h 3.78092170 0.89915794 2.53355169

h 2.71158028 1.34364712 0.21329680

cl -2.23578548 -2.02049065 -4.24692154

cl -4.06472778 2.03594995 -2.35286069

o -1.31521499 1.10965824 -4.86022377

o -4.23548985 -1.14979303 -1.94719291

h -5.05798674 -0.64178616 -1.82302737

h -4.41633749 -1.94937897 -2.47498679

h -1.18743956 0.50674123 -5.61347532

h -0.44519067 1.46280527 -4.57727098

**Eu(cca)(H2O)2Cl2**

c -0.33366978 -0.19088611 0.10553581

o -0.31012756 -0.72896880 1.35000122

c 0.71873873 -0.57584304 2.22885752

c 1.85390306 0.17688754 1.86263096

c 1.85996020 0.74919450 0.55045778

c 0.81625736 0.58804798 -0.32206309

c 0.60442281 -1.18088949 3.48391461

c 1.65117562 -1.02644718 4.38985395

c 2.79882646 -0.28014082 4.05281401

c 2.90074325 0.31547317 2.80306673

c 0.91229028 1.23698330 -1.70741820

o -0.11424047 1.08315480 -2.48116875

eu -2.20256710 0.17523323 -2.70368910

o -1.35715866 -0.43078414 -0.54593539

o 1.93358874 1.84115994 -1.98812342

h 1.57827199 -1.49245894 5.37730455

h 3.60964346 -0.17137456 4.77794504

h -0.29260311 -1.75527716 3.72650790

h 3.78511572 0.89751327 2.52818823

h 2.71478367 1.33843338 0.20445336

cl -2.20838547 -2.02079415 -4.22326660

cl -4.03369045 2.02626419 -2.32835174

o -1.36495650 1.10376692 -4.85484076

o -4.20900154 -1.14648724 -1.94940698

h -5.03234148 -0.64010090 -1.82581139

h -4.38583803 -1.94170928 -2.48486543

h -1.25033474 0.50002390 -5.60934496

h -0.49184725 1.46530104 -4.59576797

**Tb(cca)(H2O)2Cl2**

c -0.33711365 -0.19024935 0.10026522

o -0.31613535 -0.72734451 1.34456837

c 0.71334708 -0.57448840 2.22435427

c 1.84863818 0.17799219 1.85846174

c 1.85567713 0.75120884 0.54735690

c 0.81185329 0.58984935 -0.32553041

c 0.60070223 -1.17999887 3.47861385

c 1.64807737 -1.02704692 4.38430882

c 2.79559994 -0.28071389 4.04787254

c 2.89624429 0.31552881 2.79856324

c 0.90912819 1.23429906 -1.71088362

o -0.11172581 1.07002354 -2.48854804

tb -2.17683530 0.16486296 -2.69292140

o -1.35845315 -0.43156075 -0.55416542

o 1.92810595 1.84459674 -1.99003446

h 1.57546544 -1.49448657 5.37090158

h 3.60643339 -0.17289762 4.77361870

h -0.29650405 -1.75370598 3.72136235

h 3.78097057 0.89707571 2.52338743

h 2.71085382 1.34162033 0.20350212

cl -2.15908027 -2.02056170 -4.18339062

cl -3.98093033 2.00528502 -2.31223416

o -1.37116325 1.09750128 -4.81780243

o -4.15913010 -1.13790965 -1.95321870

h -4.98608255 -0.63502812 -1.84205782

h -4.32546759 -1.94547462 -2.47342944

h -1.26704359 0.49825442 -5.57724667

h -0.49131480 1.44236326 -4.55504513

**Sm(cca)2(H2O)2Cl**

c 0.40182206 -0.45998752 -6.98537540

c 0.76205319 -0.23064062 -5.63825846

c 2.10326171 0.09557678 -5.35208130

c 3.07009649 0.19870047 -6.35660791

c 2.68596983 -0.03315261 -7.67545891

c 1.35356450 -0.36308253 -7.99235773

c -0.14384884 -0.30694601 -4.52915049

c 0.25901362 -0.08969245 -3.24035621

c 1.65682423 0.24302538 -2.99214363

o 2.49145103 0.31990159 -4.06747007

o 2.18671751 0.46985602 -1.90700853

sm 1.44034803 0.36890566 0.44675177

o -0.31170803 -0.15118019 -0.91353768

c -0.77853918 -0.20720962 -2.11404562

o -1.94894075 -0.35738885 -2.43197703

o -0.19198361 1.02641511 2.19328666

c -0.74059421 0.45199248 3.13435864

o -1.73701513 1.15996492 3.73400617

c -2.46714473 0.70768505 4.79076910

c -2.20267391 -0.56413668 5.33835220

c -1.15493333 -1.33090258 4.73230743

c -0.43399304 -0.86918646 3.66407347

c -2.97878385 -0.99633205 6.43801928

c -3.97488260 -0.17924018 6.95534182

c -4.21748161 1.08590460 6.38428211

c -3.46849132 1.53845251 5.30099297

c 0.66655678 -1.76745844 3.08754826

o 0.88093883 -2.83462477 3.64273190

o 1.28803456 -1.32166779 2.04720473

h -3.64281678 2.51547313 4.84349823

h -5.00628614 1.72430742 6.79463387

h -4.57453394 -0.51599872 7.80591583

h -2.78084183 -1.98186791 6.87044048

h -0.90059906 -2.32414675 5.11611414

h -1.19966984 -0.54775935 -4.69082355

h 4.09752989 0.45586783 -6.08829117

h 3.43141508 0.04250312 -8.47310829

h 1.07065785 -0.54282832 -9.03343678

h -0.63626778 -0.71498942 -7.21914196

o 3.10270739 -1.52346921 0.20642063

o 0.78655803 2.80871415 0.12622978

cl 3.54154587 1.93942070 1.21165466

h 0.02700186 3.10317707 0.65739822

h 1.59265888 3.25794291 0.45884591

h 4.06513739 -1.39583993 0.17220674

h 2.85597992 -1.99312353 1.03604805

**Eu(cca)2(H2O)2Cl**

c 0.40492210 -0.46827653 -6.96954012

c 0.76525557 -0.22612363 -5.62471056

c 2.10491967 0.10700566 -5.33911800

c 3.07112408 0.21105660 -6.34422207

c 2.68710566 -0.03503308 -7.66087008

c 1.35707462 -0.37687236 -7.97574568

c -0.14211625 -0.29792094 -4.51740074

c 0.25955737 -0.07867345 -3.22875071

c 1.65775108 0.25050080 -2.97930837

o 2.49211574 0.33533961 -4.05458212

o 2.18595576 0.46965849 -1.89194357

eu 1.43337524 0.36598459 0.44563755

o -0.30726737 -0.14532642 -0.90111530

c -0.77661151 -0.19451725 -2.10143733

o -1.94834328 -0.33677411 -2.41647315

o -0.19173329 1.02356517 2.17688656

c -0.73855847 0.45281908 3.12164950

o -1.73482442 1.16134214 3.72162533

c -2.46260691 0.70933819 4.78042555

c -2.19507384 -0.56055409 5.33097267

c -1.14843142 -1.32680416 4.72521782

c -0.43070012 -0.86565542 3.65524936

c -2.96759844 -0.99414068 6.43252277

c -3.96547031 -0.17997204 6.95044470

c -4.21165419 1.08296490 6.37729836

c -3.46611547 1.53664505 5.29156971

c 0.66708076 -1.76238179 3.07717657

o 0.87994736 -2.83237457 3.62716842

o 1.29001975 -1.31163335 2.04003263

h -3.64687300 2.51211739 4.83448744

h -5.00182533 1.71879888 6.78761339

h -4.56500101 -0.51735771 7.80072784

h -2.76822853 -1.97970808 6.86362028

h -0.89238113 -2.31879258 5.11033535

h -1.19689763 -0.53928041 -4.68189812

h 4.09688950 0.47586411 -6.07579088

h 3.43096805 0.03532666 -8.46024513

h 1.07531404 -0.57073539 -9.01436138

h -0.63253450 -0.72917938 -7.19956160

o 3.07794523 -1.51462376 0.20269357

o 0.78104305 2.79100657 0.11637788

cl 3.52108932 1.92115080 1.22638559

h 0.01713422 3.07616472 0.64755154

h 1.58383930 3.23680258 0.46363705

h 4.04048347 -1.38986278 0.15961063

h 2.83321023 -1.96980500 1.04174209

**Tb(cca)2(H2O)2Cl**

c 0.41053924 -0.45264250 -6.95493603

c 0.76409739 -0.22680886 -5.60508776

c 2.10279846 0.10196710 -5.31057978

c 3.07457566 0.20832777 -6.30952787

c 2.69778824 -0.02116369 -7.63063908

c 1.36755681 -0.35148346 -7.95632458

c -0.14567231 -0.31335336 -4.50039101

c 0.25203744 -0.10184095 -3.20888972

c 1.64509237 0.24230441 -2.95335674

o 2.48444772 0.32542503 -4.02372360

o 2.16550088 0.47675714 -1.86510468

tb 1.40562105 0.33226904 0.43703479

o -0.31639668 -0.20056264 -0.88270909

c -0.78432119 -0.23818502 -2.08431435

o -1.95447290 -0.38557890 -2.40282726

o -0.19262835 1.01683962 2.14766574

c -0.73567218 0.44895437 3.09738135

o -1.72591960 1.16131794 3.70119262

c -2.45204520 0.71283895 4.76311493

c -2.18535089 -0.55741674 5.31323147

c -1.13999021 -1.32522261 4.70601225

c -0.42506337 -0.86804491 3.63206434

c -2.95833278 -0.98960781 6.41521931

c -3.95498395 -0.17317824 6.93249559

c -4.19868803 1.09165549 6.36140728

c -3.45174956 1.54420304 5.27589798

c 0.67157954 -1.76726246 3.05318093

o 0.90093088 -2.82532096 3.61942840

o 1.27476108 -1.33004797 1.99859238

h -3.62734318 2.52076530 4.81886292

h -4.98670912 1.72956598 6.77320719

h -4.55391932 -0.50932413 7.78357697

h -2.75770950 -1.97405052 6.84849072

h -0.88303262 -2.31644964 5.09278250

h -1.19896781 -0.55934078 -4.66812849

h 4.10013533 0.46532795 -6.03491879

h 3.44811106 0.05658413 -8.42337894

h 1.09081566 -0.52827078 -8.99950695

h -0.62572318 -0.70886022 -7.19469118

o 3.08707047 -1.47111130 0.15217090

o 0.79570723 2.73623180 0.10766791

cl 3.50000381 1.83458424 1.23836434

h 0.05848393 3.01789784 0.67763126

h 1.61768556 3.16220808 0.43568906

h 4.03176546 -1.24271977 0.13035733

h 2.88526535 -1.96442473 0.97858459

**Tb(cca)2(H2O)Cl**

c 0.68925589 -0.60602766 -6.91098785

c 0.97318208 -0.44097975 -5.53559446

c 2.32163000 -0.45863345 -5.12313080

c 3.37060142 -0.62747627 -6.03090763

c 3.06088877 -0.78144592 -7.38014555

c 1.72270906 -0.77275020 -7.82282400

c -0.01705954 -0.24125491 -4.52048922

c 0.31187844 -0.06300695 -3.20343637

c 1.71698201 -0.10092600 -2.82671690

o 2.63381672 -0.30351743 -3.80683708

o 2.18743229 0.03260328 -1.69327843

tb 1.28896844 0.72280431 0.40729457

o -0.44523886 0.43855357 -0.98370719

c -0.81794131 0.18056127 -2.19069529

o -1.96739769 0.12585989 -2.59961843

o -0.18768008 1.18579066 2.24291277

c -0.63331264 0.49497911 3.16258693

o -1.55672431 1.11435473 3.94483304

c -2.17951131 0.52547628 5.00311041

c -1.86850452 -0.80405229 5.35406971

c -0.88832796 -1.47767627 4.55555487

c -0.27554759 -0.87799537 3.48803544

c -2.53852129 -1.38167953 6.45701694

c -3.47767377 -0.64653844 7.16803455

c -3.76621890 0.68100256 6.79367495

c -3.12157393 1.27625453 5.71161222

c 0.75581270 -1.68858135 2.68815184

o 1.01645696 -2.81566405 3.07325888

o 1.26015139 -1.09636831 1.65492761

h -3.33328962 2.30307794 5.40445471

h -4.50685692 1.25550163 7.35809183

h -3.99571180 -1.09654152 8.01953030

h -2.30510283 -2.41329885 6.73662758

h -0.60150707 -2.50931358 4.78302336

h -1.08047569 -0.21749625 -4.77875948

h 4.40086222 -0.63212353 -5.66743135

h 3.87107205 -0.91074222 -8.10417271

h 1.50079632 -0.89693636 -8.88655758

h -0.35382769 -0.59709805 -7.24066877

o 0.66595644 3.06398392 -0.10188276

cl 3.36189866 2.21800375 1.10381401

h -0.22905909 3.43995023 -0.05335958

h 1.31027365 3.66178083 0.32508585

**Tb(cca)2(H2O)(NO3)**

c 2.19132233 -2.07627034 -5.74493217

c 2.53770900 -1.60476720 -4.47589064

c 3.77916312 -0.98774838 -4.22161198

c 4.69258451 -0.85202557 -5.29206610

c 4.36093092 -1.31670403 -6.55741978

c 3.11063910 -1.92692947 -6.78070736

c 4.02461815 -0.54040051 -2.88347530

c 3.10807920 -0.69808888 -1.87884426

c 1.84632897 -1.34980643 -2.18817925

o 1.63535297 -1.75826573 -3.46719694

o 0.91670936 -1.59279013 -1.41126752

tb 0.49367261 -0.96388018 0.89103109

c 3.46596932 -0.18225302 -0.47628263

o 2.55424309 -0.33171615 0.42668274

o -0.97862732 -0.15788649 2.62547016

c -1.77113855 0.78219253 2.71801925

c -2.02577400 1.81929648 1.72879243

c -2.92304373 2.80839229 2.03064370

c -3.62570095 2.84699917 3.27847195

c -3.36655974 1.80640042 4.19435263

o -2.46924233 0.83067852 3.88319397

c -4.00620365 1.73627400 5.43512678

c -4.92082453 2.73309016 5.76682425

c -5.19790220 3.78816748 4.87411213

c -4.55814648 3.84496212 3.64320421

c -1.33705878 1.84187651 0.35781130

o -1.63516486 2.74171710 -0.41343319

o -0.49568111 0.89079279 0.13548462

o -1.47980595 -2.17742467 -0.05836297

o 4.56444740 0.32158235 -0.32035020

h 1.21802044 -2.54784489 -5.89812326

h 2.85589337 -2.29106355 -7.78058147

h 5.06913376 -1.21026027 -7.38381338

h 5.65998316 -0.37648377 -5.10519028

h 4.97005033 -0.05254456 -2.62549019

h -3.09342241 3.57950807 1.27277982

h -3.77510095 0.91107231 6.11251068

h -5.42825127 2.69431925 6.73534775

h -5.91700411 4.56280565 5.15375519

h -4.76381636 4.65884113 2.94178867

h -1.46246052 -2.19417238 -1.03219914

h -1.42271769 -3.09933639 0.25768453

o 0.39505279 -3.35486078 1.50679517

o 1.40940404 -2.07743192 2.91766667

n 1.03622067 -3.25541759 2.62475729

o 1.25893795 -4.21308041 3.31899834

**Eu(cca.H2O)(H2O)2Cl2**

c 2.57760262 0.02716660 3.33462620

c 1.59260666 -0.12346532 2.33168030

c 0.47221270 -0.93573999 2.60665941

c 0.31640536 -1.58621562 3.83363390

c 1.30358601 -1.41991758 4.80241728

c 2.43421435 -0.61525810 4.55659008

c 1.64414394 0.50237250 1.04515243

c 0.64947248 0.33669260 0.12029910

c -0.48867905 -0.51851481 0.44187999

o -0.50032347 -1.10486662 1.66777444

o -1.45292187 -0.78294116 -0.27754009

eu -2.25698447 -0.03889755 -2.48453927

o -4.25779009 -1.39270782 -1.76295865

c 0.73476368 1.05243540 -1.21496177

o 1.76140451 1.66967309 -1.51156592

o -0.29741850 0.96784818 -1.96269226

cl -2.22427034 -2.27455592 -3.96446419

cl -4.14727640 1.76077044 -2.11963105

o -1.34593129 0.83255589 -4.56933403

h 1.19575477 -1.92243862 5.76825762

h 3.19755697 -0.49766010 5.33086729

h -0.56589901 -2.20674300 4.00534630

h 3.44901299 0.65621632 3.13017797

h 2.48981738 1.14234102 0.77394837

h -5.09995365 -0.90621459 -1.70644319

h -4.37768984 -2.20956254 -2.28326178

h -1.27321923 0.21566024 -5.31668615

h -0.50462061 1.38102663 -4.51116991

h 1.29039347 2.08052063 -3.31046939

o 0.95863438 2.15046716 -4.24141216

h 1.56818449 2.69752765 -4.75749016

**Eu(cca.H2O)2(H2O)2Cl**

c -3.45153809 1.83352602 5.38901758

c -2.45927978 0.98216486 4.89559412

c -2.20761728 -0.27893025 5.47454453

c -2.98763847 -0.67890298 6.58313751

c -3.97652102 0.15857095 7.08157492

c -4.20554781 1.41258383 6.48213577

c -1.16682684 -1.06956577 4.88834810

c -0.44636878 -0.63618231 3.81038475

c -0.73931438 0.67565876 3.23597217

o -1.73013818 1.40440416 3.82629800

o -0.19278422 1.21368861 2.27746797

eu 1.56181347 0.48570153 0.58707672

cl 3.40285873 2.23583746 1.51779926

c 0.64363015 -1.52188003 3.23530793

o 1.24658167 -1.08556652 2.20183587

o 2.26972628 0.53343958 -1.76645887

c 1.70541096 0.37702948 -2.84836888

c 0.28538659 0.13512357 -3.08125734

c -0.15426446 0.01997095 -4.37491417

c 0.73547870 0.10822088 -5.49423981

c 2.10130739 0.31775665 -5.22279406

o 2.52608156 0.44070214 -3.93501425

c 3.05152202 0.40613359 -6.24379063

c 2.61863208 0.28438243 -7.56289911

c 1.25806427 0.07628067 -7.86505699

c 0.32347226 -0.01126523 -6.84151220

c -0.71435875 -0.00081173 -1.92843759

o -1.90853071 -0.13292636 -2.20305920

o -0.23188655 0.01769408 -0.74457890

o 3.07249022 -1.41522527 0.23745954

o 0.75454050 2.85784483 0.09862668

o 0.89457148 -2.60282397 3.78197742

h -3.61525726 2.80199242 4.91076469

h -4.98650169 2.06892586 6.87806225

h -4.57892799 -0.15278685 7.93957138

h -2.79832840 -1.65573919 7.03828859

h -0.92175281 -2.05453539 5.29793167

h -1.21741402 -0.14811836 -4.56826735

h 4.10179281 0.56848949 -5.99056673

h 3.34971285 0.35295415 -8.37436390

h 0.93986768 -0.01675826 -8.90725899

h -0.73752737 -0.17314267 -7.05438375

h -0.05979731 3.06296873 0.59121454

h 1.48954988 3.36470795 0.50627536

h 3.87295842 -1.44708192 -0.30775088

h 3.09075713 -2.15514970 0.92316347

h -2.98867583 -0.25419363 -3.59357834

o -3.42579961 -0.31725407 -4.47794771

h -4.37892580 -0.40859443 -4.32945490

h 2.32733250 -3.14550877 2.72300577

o 3.05532932 -3.36721778 2.08272219

h 2.96785903 -4.30621004 1.85790873

**Eu(cca.H2O)3**

c 3.17953277 -6.36842251 -1.09857285

c 2.71776199 -5.13944578 -0.57319152

c 3.66557527 -4.15521479 -0.23064290

c 5.03826761 -4.36194277 -0.39444110

c 5.46522808 -5.57989979 -0.91933852

c 4.54050303 -6.58369923 -1.27162361

o 3.25104332 -2.96057367 0.27257144

c 1.94746411 -2.62021661 0.45273757

c 0.92896676 -3.60966182 0.12001477

c 1.33489716 -4.82621241 -0.36736137

o 1.76445556 -1.48668778 0.89937192

eu -0.13270752 0.02830164 0.74931157

o -0.88686764 -2.09994960 0.52701706

c -0.56476206 -3.32128811 0.29836646

o -1.36020505 -4.25356579 0.19513179

o -1.66015077 0.49441612 2.55414295

c -1.74194515 1.43506753 3.34952545

c -0.66364527 2.31322026 3.78214574

c -0.94894326 3.29698491 4.69516087

c -2.27162719 3.49737096 5.20599222

c -3.28239369 2.62730312 4.75313139

o -2.97794795 1.63538206 3.87096286

c -2.61639881 4.51421881 6.12590361

c -3.92923498 4.64464808 6.55789804

c -4.92087603 3.76197624 6.08354330

c -4.60724545 2.74630809 5.18218279

c 0.76086444 2.16888785 3.24003077

o 0.90345377 1.42467165 2.20276308

o -1.30518663 1.48416948 -0.53128844

c -1.48141336 2.02930713 -1.67953098

c -0.62963587 1.48520315 -2.82752419

c 0.43165675 0.51377952 -2.59923649

o 1.13331640 0.07105265 -3.67625523

c 0.89959383 0.47052112 -4.95741606

c -0.11123814 1.41445780 -5.22439766

c -0.86315125 1.91001141 -4.11142445

c -0.32947946 1.81123769 -6.56370831

c 0.44089931 1.26843297 -7.58306360

c 1.44260156 0.32276252 -7.28600121

c 1.68173528 -0.08241812 -5.97477293

o 0.78563946 0.03105487 -1.52027583

o -2.27823019 2.93593764 -1.91323805

o 1.66968727 2.77592921 3.80237818

h -5.36122656 2.05111527 4.80472946

h -5.95427275 3.87144494 6.42639542

h -4.19849253 5.43222857 7.26719809

h -1.83184850 5.18754959 6.48302507

h -0.15037683 3.95685363 5.04581308

h 0.58780915 -5.58662319 -0.61364323

h 5.73947525 -3.57234025 -0.11404885

h 6.53624487 -5.75600147 -1.05771923

h 4.89822388 -7.53231716 -1.68150687

h 2.44609404 -7.13602018 -1.36288142

h -1.64851630 2.64717531 -4.30145359

h -1.11184871 2.54620886 -6.77310419

h 0.27240869 1.57278037 -8.61948299

h 2.04350352 -0.10339227 -8.09553146

h 2.45288253 -0.81413400 -5.72391748

h -1.41555572 -5.95796156 -0.34280834

o -1.20322132 -6.85052729 -0.70741129

h -2.01916623 -7.37293005 -0.71023893

h -2.91274524 3.89329720 -3.28688645

o -3.11216617 4.25666142 -4.18244696

h -3.78247404 4.94916582 -4.08316088

h 1.89484823 3.98723483 5.09935093

o 1.77454352 4.67764139 5.79467058

h 2.62869287 5.11522484 5.92884350

(**cca.3H2O)-**

c 0.99721915 0.97764653 0.25564000

c 2.34974122 0.47787663 0.19361582

c 2.51956773 -0.89637870 -0.07530172

o 1.44511056 -1.71009612 -0.22285129

c 0.11646657 -1.27423704 -0.14671348

c -0.07787779 0.17266320 0.04179629

c 3.50277472 1.27250469 0.36112082

c 4.77510595 0.71711296 0.25386617

c 4.91804790 -0.65354329 -0.02323188

c 3.79470301 -1.46344876 -0.18803687

o -0.73155427 -2.12657523 -0.20983274

c -1.49209929 0.75039405 -0.05703594

o -2.08266354 0.50339949 -1.13043392

o -1.87858450 1.44249058 0.91699791

o -4.77072287 -0.12724137 -0.83794188

o -4.50044632 2.14449668 0.93919706

o -3.82360101 -2.71316218 -0.05949470

h 3.37783003 2.33909202 0.57512498

h 5.66199255 1.34548819 0.38440767

h 3.87989092 -2.53151083 -0.40356392

h 5.91684628 -1.09304893 -0.11211933

h 0.82675266 2.03995323 0.46117914

h -3.52702832 1.90225112 0.99072838

h -4.55895329 2.79073930 0.21789229

h -3.85252857 0.12436410 -1.11109328

h -4.94880152 0.48815966 -0.09413425

h -4.27459335 -1.86680198 -0.29378039

h -2.87037849 -2.51838088 -0.12519661

**Cl.(H2O)6**

cl 1.12164795 -1.35234153 -1.32763588

h 0.48532391 -1.57624757 0.94325286

o 0.18925022 -1.38680685 1.86207211

h -0.63332123 -0.85297555 1.76330638

h 1.09446025 0.26812157 2.24297380

o 1.22716558 1.24150240 2.14501047

h 1.78644776 1.33376634 1.33902955

o 2.79215693 1.04501832 -0.22458565

h 2.27695394 0.30951312 -0.65757805

h 3.65156126 0.65461671 -0.00002891

h -0.84885186 -1.90347385 -2.95536542

o -1.72862399 -1.64029312 -3.29183936

h -0.45736533 -0.00148601 -1.34701526

h -1.94612348 -0.86081779 -2.74281645

o -1.26603460 0.58719271 -1.39809906

h -0.98336673 1.37852621 -1.88326299

h -0.65341324 1.29550183 1.66898406

o -1.51933086 0.88587850 1.43277156

h -1.55690014 0.86698854 0.44994524

**(H2O)6 cluster**

o -0.74862808 -1.86848772 0.09778927

o -1.62392950 -0.41905797 -1.88177228

o -0.87631476 -0.06768820 2.18948197

o 0.39153033 1.20559800 -1.50926447

o -0.00591563 2.23343205 1.00984108

h -1.21440661 -1.39311373 -0.66962546

h -1.05056298 -2.78940177 0.12672046

h 0.74984634 2.61578989 1.48194158

h -0.30704331 1.43469203 1.51916337

h -1.77389967 -0.05889659 2.55677867

h -0.83829302 -0.78703028 1.50819159

h 1.08966994 0.53338897 -1.32591689

h 0.26587293 1.70262873 -0.65981168

h -0.90746927 0.30446768 -1.83992302

h -2.48733974 -0.00083276 -2.01598883

o 1.83126557 -1.04282510 -0.69760460

h 1.02753770 -1.50640988 -0.36263725

h 2.28956294 -1.64067650 -1.30826890

**(H2O)4 cluster**

o 0.52763391 -1.75087464 0.28078076

o -1.01213014 -0.45672929 -1.50365937

o -0.69751883 1.82960451 -0.10033166

o 1.02265608 0.58051783 1.55165255

h -0.06946900 -1.41244364 -0.44441298

h 1.15103948 -2.38320947 -0.10750774

h -0.03749243 1.49462891 0.57105935

h -1.38147962 2.32524729 0.37481764

h -1.01183164 0.45442906 -1.09549856

h -1.92226005 -0.68140280 -1.75044215

h 0.94980723 -0.34839010 1.19377935

h 1.96252465 0.81766659 1.57799804

**(H2O)3 cluster**

h 1.02761340 -1.70843422 -1.36162031

o 0.71889395 -1.33623421 -0.52159667

h 1.11560762 -0.43741244 -0.41058755

h 0.90245175 2.12338161 -0.37048516

o 0.87616342 1.31257749 0.16095263

h -0.06769354 1.12589645 0.39511120

o -1.48982775 -0.03298494 0.44062459

h -1.90982902 -0.36482051 1.24993026

h -0.94838732 -0.76336271 0.05382542

**(H2O)2 cluster**

o -0.52836740 -0.92619210 0.54570162

o 0.71445513 1.33251834 -0.65570998

h 0.24509898 2.14665627 -0.41566873

h 0.26312202 0.59352773 -0.19462588

h 0.06320909 -1.48257983 1.07923746

h -0.92304653 -1.50190318 -0.13036160
